# Supplementary material for: Novel addition reactions of titanacycle phosphonates by tuning of Ti(O-i-Pr)4/2i-PrMgClElectronic supplementary information (ESI): further experimental details. See http://www.rsc.org/suppdata/cc/b2/b209149f/
Source: Royal Society of Chemistry journal article supplement (doi:10.1039/b209149f), 2002-11-25
Supplement: b209149f.doc [file b209149f.doc]

**Novel Addition Reactions of Titanacycle Phosphonates by Tuning Ti(O-*i-*Pr)4 / 2 *i*-PrMgCl**

Abed Al Aziz Quntar and Morris Srebnik*

Department of Medicinal Chemistry and Natural Products, School of Pharmacy, Hebrew University, Jerusalem 91120 Israel

# Supporting information

**General Procedure for 2**. To 0.31g (1.1 mmol) of titanium(IV)isopropoxide dissolved in 6 ml of dry ether at -780C in a 50 ml round-bottom flask was added 1.05 ml of 2M *i*-PrMgCl (2.1 mmol) dropwise. Then 0.218 g (1 mmol) of 1-alkynylphosphonate was added. The mixture was stirred for 2 h at ~ -300C. Then 1 mmol of a Grignard was added at -780C, and the temperature was slowly raised to room temperature over 2 h, and the mixture was left stirring overnight at 250C. The reaction was worked up with diluted HCl at 00C, and the product was extracted with ether, separated on silica gel column (85% petroleum ether : 15% ethyl acetate), and analyzed by GCMS and NMR spectroscopy.

**General Procedure for 3**. To 0.57g (2 mmol) of titanium(IV)isopropoxide dissolved in 9 ml of dry ether at -780C in a 50 ml round-bottom flask was added 2 ml of 2M *i*-PrMgCl (4 mmol) dropwise. Then 0.218 g (1 mmol) of 1-hexynylphosphonate was added. The mixture was stirred for 3 h at ~ -300C. Then 1 mmol of a Grignard was added followed by 1 mmol of an acylchloride at -780C, and the temperature was slowly raised to 250C over 2 h. The mixture was left stirring overnight at 250C, and the reaction was worked up and the products were isolated as for **2**.

**General Procedure for 4**. To 0.31g (1.1 mmol) of titanium(IV)isopropoxide dissolved in 6 ml of dry ether at -780C in a 50 ml round-bottom flask was added 1.05 ml of 2M *i*-PrMgCl (2.1 mmol) dropwise. Then 0.218 g (1 mmol) of 1-hexynylphosphonate was added. The mixture was stirred for 3 h at ~ -300C. Then 1 mmol of PhMgBr followed by 1 mmol of acylchloride were added at -780C, and the temperature was slowly raised to 250C over 2h. The mixture was left stirring overnight at 250C. The reaction was worked up and the products were isolated as for **2**.

**General Procedure for 5**. To 0.31g (1.1 mmol) of titanium(IV)isopropoxide dissolved in 6 ml of dry ether at -780C in a 50 ml round-bottom flask was added 1.5 ml of 2M *i*-PrMgCl (3 mmol) dropwise. Then 0.218 g (1 mmol) of 1-hexynylphosphonate was added. The mixture was stirred for 3 h at ~ -300C. Then 10% mol of CuBrSMe2 followed by 1 mmol of acylchloride were added at -780C, and the temperature was slowly raised to 250C over 2 h. The mixture was left stirring overnight at 250C. The reaction was worked up and the products were isolated as for **2**.

**2a:** 1H NMR (300 MHz):  0.89 (t, 3H, *J*HH = 5.7 Hz), 1.03 (d, 6H, *J*HH = 6.6 Hz), 1.29 (t, 6H, 3*J*PH = 6.9 Hz), 1.20-1.48 (overlap, 4H), 2.34 (m, 1H), 2.45 (m, 2H), 3.99 (m, 4H), 5.29 (d, 1H, 2*J*PH =18.0 Hz); 31P NMR (300 MHz):  19.96; 13C NMR (75.5 MHz):  173.5 (d, 2*J*pc = 6.0 Hz), 108.4 (d, 1*J*pc = 190.9 Hz), 61.5 (d, 2*J*pc = 5.7 Hz), 35.0 (d, 3*J*pc = 21.2 Hz, *trans*), 31.2 (d, 3*J*PC = 7.5 Hz, *cis*), 30.2 (d, 4*J*PC = 2.3 Hz), 23.0, 21.8, 16.2 (d, 3*J*pc = 6.6 Hz), 13.8; MS(EI):m/z (%) 262 (38.3), 233 (100), 219 (35.1), 205 (22.2), 177 (73.5), 138 (16.3), 111 (28.6), 81 (32.3), 41 (23.5).Anal. Calcd. for C13H27O3P: C, 59.522; H, 10.374; P, 11.807. Found: C, 59.489; H, 10.302; P, 11.789.

**2b:** 1H NMR (300 MHz):  0.85 (d, 6H, *J*HH = 6.5 Hz), 1.36 (t, 6H, 3*J*PH = 6.9 Hz), 2.34 (m, 1H), 2.48 (m, 1H), 4.09 (m, 4H), 5.74 (d, 1H, 2*J*PH =17.5 Hz), 7.30-7.60 (m, 5H); 31P NMR (300 MHz):  17.80; 13C NMR (75.5 MHz):  165.0 (d, 2*J*pc = 5.8 Hz), 140.3 (d, 2*J*pc = 8.5 Hz), 113.4 (d, 1*J*pc = 189.9 Hz), 61.5 (d, 2*J*pc = 5.6 Hz), 34.3 (d, 3*J*pc = 20.2 Hz, *trans*), 21.7, 16.1 (d, 3*J*pc = 6.5 Hz); MS(EI):m/z (%) 282 (13.3), 267 (20.5), 253 (44.1), 207 (19.8), 177 (66.5), 138 (14.9), 77 (36.8), 43 (37.7), 41 (29.7), 29 (100). Anal. Calcd. for C15H23O3P: C, 63.82; H, 8.212; P, 10.971. Found: C, 63.770; H, 8.93; P, 10.956.

**2c:** 1H NMR (300 MHz):  0.98 (t, 6H, *J*HH = 7.6 Hz), 1.32 (t, 6H, 3*J*PH = 7.2 Hz), 1.95 (m, 2H), 2.20 (q, 2H, *J*HH = 7.5 Hz), 2.33 (m, 1H), 3.57 ( broad t, 2H, *J*HH = 6.6 Hz), 4.06 (m, 4H), 5.40 (d, 1H, 2*J*PH =17.7 Hz); 31P NMR (300 MHz):  18.35; 13C NMR (75.5 MHz):  166.9 (d, 2*J*pc = 4.3 Hz), 111.1 (d, 1*J*pc = 190.0 Hz), 61.3 (d, 2*J*pc = 5.4 Hz), 44.8, 31.7 (d, 4*J*pc = 2.0 Hz), 31.5 (d, 3*J*pc = 7.5 Hz, *cis*), 31.1 (d, 3*J*pc = 22.3 Hz, *trans*), 16.3 (d, 3*J*pc = 6.6 Hz), 11.8; MS(EI):m/z (%) 283 (2.4), 281 (7.2), 219 (2.9), 218 (3.4), 207 (5.8), 89 (20.0), 79 (21.6), 43 (69.2), 29 (63.0), 18 (100).

Anal. Calcd. for C12ClH24O3P: C, 50.976; Cl, 12.539; H, 8.556; P, 10.955. Found: C, 51.005; Cl, 12.500; H, 8.489; P, 11.002.

**2d:** 1H NMR (300 MHz):  0.90 (t, 3H, *J*HH = 7.2 Hz), 0.92 (t, 3H, *J*HH = 7.2 Hz), 1.30 (t, 6H, 3*J*PH = 6.8 Hz), 1.20-1.88 (overlap, 4H), 2.13 (t, 2H), 2.49 (m, 2H), 4.04 (m, 4H), 5.35 (d, 1H, 2*J*PH =18.6 Hz); 31P NMR (300 MHz):  15.26; 13C NMR (75.5 MHz):  173.5 (d, 2*J*pc = 6.1 Hz), 108.4 (d, 1*J*pc = 190.0 Hz), 61.1 (d, 2*J*pc = 5.7 Hz), 35.0 (d, 3*J*pc = 21.1 Hz, *trans*), 33.2 (d, 3*J*PC = 7.4 Hz, *cis*), 30.8 (d, 4*J*PC = 2.2 Hz), 16.2 (d, 3*J*pc = 6.7 Hz), 15.0, 13.8; MS(EI):m/z (%) 248 (7.2), 219 (13.0), 191 (21.2), 164 (28.8), 124 (21.2), 96 (31.7), 81 (40.4), 55 (48.1), 41 (100), 29 (48.2).

Anal. Calcd. for C12H25O3P: C, 58.047; H, 10.149; P, 12.474. Found: C, 58.300; H, 10.009; P, 12.407.

**2e:** 1H NMR (300 MHz): 1.03 (t, 3H, *J*HH = 7.1 Hz), 1.33 (t, 6H, *J*PH = 6.8 Hz), 2.99 (m, 2H), 4.13 (m, 4H), 5.75 (d, 1H, 2*J*PH =17.1 Hz), 7.25-7.60 (m, 5H); 31P NMR (300 MHz):  17.28; 13C NMR (75.5 MHz):  164.9 (d, 2*J*pc = 4.3 Hz), 140.5 (d, 2*J*pc = 8.0 Hz, *cis*), 128.3, 128.1, 113.2 (d, 1*J*pc = 192.5 Hz), 61.5 (d, 2*J*pc = 6.0 Hz), 34.5 (d, 3*J*pc = 21.5 Hz, *trans*), 16.3 (d, 3*J*pc = 6.9 Hz), 12.3; MS(EI):m/z (%) 268 (52.5), 212 (12.1), 130 (49.5), 129 (39.4), 119 (22.2), 91 (12.1), 77 (11.6), 28 (100). Anal. Calcd. for C14H21O3P: C, 62.676; H, 7.890; P, 11.545. Found: C, 62.700; H, 7.849; P, 11.298.

**2f:** 1H NMR (300 MHz):  0.83 (t, 3H, *J*HH = 6.3 Hz), 1.33 (t, 3H, *J*HH = 7.5 Hz), 1.23-1.50 (overlap, 4H), 2.96 (m, 2H), 4.10 (broad m, 4H), 5.72 (d, 1H, 2*J*PH =17.1 Hz), 7.30-7.40 (overlap, 5H); 31P NMR (300 MHz):  17.93; 13C NMR (75.5 MHz):  163.7 (d, 2*J*pc = 8.9 Hz), 141.1 (d, 3*J*pc = 24.1 Hz, *trans*), 128.8, 128.6, 126.4, 113.7 (d, 1*J*pc = 190.0 Hz), 61.3 (d, 2*J*pc = 5.4 Hz), 32.3 (d, 3*J*pc = 6.6 Hz, *cis*), 30.8 (d, 4*J*pc = 2.3 Hz), 22.6, 16.3 (d, 3*J*pc = 6.6 Hz), 13.8; MS(EI):m/z (%) 296 (13.8), 267 (36.7), 211 (37.6), 129 (67.9), 115 (74.8), 91 (39.0), 77 (30.7), 43 (87.2), 29 (100). Anal. Calcd. for C16H25O3P: C, 64.849; H, 8.503; P, 10.452. Found: C, 64.677; H, 8.611; P, 10.589.

**2g:** 1H NMR (300 MHz):  1.07 (t, 3H, *J*HH = 7.5 Hz), 1.32 (t, 6H, 3*J*PH = 7.2 Hz), 1.95 (m, 2H), 2.20 (q, 2H, *J*HH = 7.5 Hz), 2.65 (t, 2H, *J*HH = 5.7 Hz), 3.57 ( t, 2H, *J*HH = 6.6 Hz), 4.06 (m, 4H), 5.40 (d, 1H, 2*J*PH =17.7 Hz); 31P NMR (300 MHz):  18.44; 13C NMR (75.5 MHz):  173.7 (d, 2*J*pc = 5.3 Hz), 111.2 (d, 1*J*pc = 191.0 Hz), 61.2 (d, 2*J*pc = 5.5 Hz), 44.6, 31.8 (d, 4*J*pc = 2.0 Hz), 31.4 (d, 3*J*pc = 7.4 Hz, *cis*), 31.2 (d, 3*J*pc = 22.0 Hz, *trans*), 16.2 (d, 3*J*pc = 6.6 Hz), 13.8; MS(EI):m/z (%) 268 (1.9), 233 (29.0), 219 (17.1), 163 (36.0), 96 (21.0), 81 (38.6), 65 (39.5), 41 (58.8), 29 (100). Anal. Calcd. for C11ClH22O3P: C, 49.167; Cl, 13.193; H, 8.252; P, 11.526. Found: C, 49.233; Cl; 13.023; H, 12.989; P, 11.505.

**3a:** 1H NMR (300 MHz):  0.76 (d, 2H, *J*HH = 6.6 Hz), 0.88 (t, 3H, *J*HH = 6.3 Hz), 0.92 (d, 3H, *J*HH = 6.6 Hz), 1.26 (s, 3H), 1.28 (t, 6H, 3*J*PH = 7.2 Hz), 1.20-1.93 (overlap , 5H), 2.33 (broad m, 1H), 2.47 (broad m , 2H), 4.03 (m, 4H), 5.74 (d, 1H, 2*J*PH = 16.8 Hz); 31P NMR (300 MHz):  19.51; 13C NMR (75.5 MHz):  171.9 (d, 2*J*pc = 6.6 Hz), 110.0 (d, 1*J*pc = 189.7 Hz), 78.6 (d, 3*J*pc = 20.7 Hz, *trans*), 61.1 (d, 2*J*pc = 5.7 Hz), 34.6, 33.1 (d, 4*J*pc = 2.3 Hz), 30.6 (d, 3*J*pc = 7.2 Hz, *cis*), 25.7, 23.6, 17.2, 16.3 (d, 3*J*pc = 6.3 Hz), 13.8; MS(EI):m/z (%) 306 (0.5), 288 (1.9), 263 (100), 235 (11.5), 207 (17.3), 147 (32.7), 108 (26.9), 81 (26.8), 43 (73.1), 28 (17.3). Anal. Calcd. for C15H31O4P: C, 58.804; H, 10.199; P, 10.109. Found: C, 59.002; H, 10.100; P, 10.022.

**3b:** 1H NMR (300 MHz):  0.74 (d, 3H, *J*HH = 6.9 Hz), 0.76 (t, 3H, *J*HH = 7.9 Hz), 0.88 (t, 3H, *J*HH = 6.9 Hz), 0.92 (d, 3H, *J*HH = 6.9 Hz), 1.28 (t, 6H, 3*J*PH = 7.2 Hz), 1.20-1.93 (overlap , 5H), 2.31 (broad m, 2H), 2.46 (broad m , 3H), 4.02 (m, 4H), 5.65 (d, 1H, 2*J*PH = 17.1 Hz); 31P NMR (300 MHz):  19.18; 13C NMR (75.5 MHz):  169.5 (d, 2*J*pc = 6.9 Hz), 111.7 (d, 1*J*pc = 187.7 Hz), 81.4 (d, 3*J*pc = 20.3 Hz, *trans*), 61.1 (d, 2*J*pc = 5.7 Hz), 34.6, 32.4 (d, 4*J*pc = 2.3 Hz), 30.7 (d, 3*J*pc = 7.5 Hz, *cis*), 30.1, 23.7, 17.5, 16.3 (d, 3*J*pc = 6.3 Hz), 13.8, 8.1; MS(EI):m/z (%) 320 (0.5), 302 (1.6), 291 (15.9), 277 (100), 249 (17.3), 221 (14.9), 57 (14.9), 43 (35.2), 28 (13.0). Anal. Calcd. for C16H33O4P: C, 59.978; H, 10.381; P, 9.667. Found: C, 59.788; H, 10.189; P, 9.578.

**3c:** 1H NMR (300 MHz):  0.75 (d, 3H, *J*HH = 6.8 Hz), 0.78 (t, 3H, *J*HH = 6.6 Hz), 0.89 (t, 3H, *J*HH = 6.9 Hz), 0.93 (d, 3H, *J*HH = 6.8 Hz), 1.29 (t, 6H, 3*J*PH = 7.3 Hz), 1.20-1.99 (overlap , 15H), 2.32 (broad m, 2H), 2.46 (broad m , 3H), 4.02 (m, 4H), 5.67 (d, 1H, 2*J*PH = 17.0 Hz); 31P NMR (300 MHz):  19.39; 13C NMR (75.5 MHz):  169.4 (d, 2*J*pc = 6.8 Hz), 111.6 (d, 1*J*pc = 187.8 Hz), 81.9 (d, 3*J*pc = 20.0 Hz, *trans*), 61.3 (d, 2*J*pc = 5.7 Hz), 34.6, 32.4 (d, 4*J*pc = 2.3 Hz), 30.8 (d, 3*J*pc = 7.7 Hz, *cis*), 30.2, 29.8, 27.3, 23.7 , 20.3, 19.8, 18.2, 17.5, 16.3 (d, 3*J*pc = 6.3 Hz), 14.0, 8.5; MS(EI):m/z (%) 390 (0.3), 347 (100), 319 (9.6), 291 (26.4), 91 (7.7), 81 (8.7), 43 (19.7), 28 (12.0). Anal. Calcd. for C21H43O4P: C, 64.585; H, 11.098; P, 7.931. Found: C, 64.122; H, 10.897; P, 7.730.

**3d:** 1H NMR (300 MHz):  0.65 (t, 3H, *J*HH = 7.1 Hz), 1.04 (s, 9H), 1.26 (t, 3H, 3*J*PH = 7.1 Hz), 1.00-1.50 (overlap , 5H), 2.05 (s, 2H), 2.67 (broad m, 2H), 4.00-4.20 (overlap m, 5H), 5.56 (d, 1H, 2*J*PH = 17.1 Hz), 7.15-7.50 (m, 5H); 31P NMR (300 MHz): δ 17.95; 13C NMR (75.5 MHz):  169.7 (d, 2*J*pc = 14.6 Hz), 143.7 (d, 2*J*pc = 12.6 Hz), 128.4, 127.2, 126.6, 110.1 (d, 1*J*pc = 190.3 Hz), 82.3 (d, 2*J*pc = 21.0 Hz, *trans*), 61.2 (d, 2*J*pc = 5.7 Hz), 39.5, 33.7, 32.2, 30.6 (d, 3*J*pc = 2.3 Hz, *cis*), 26.3, 23.2, 16.2 (d, 3*J*pc = 6.3 Hz), 13.9; MS(EI):m/z (%) 396 (3.5), 303 (8.7), 261 (3.5), 207 (6.6), 109 (27.0), 91 (51.3), 81 (60.5), 77 (15.8), 57 (22.3), 41 (47.3), 29 (100). Anal. Calcd. for C22H37O4P: C, 66.645; H, 9.406; P, 7.812. Found: C, 66.478; H, 9.29; P, 7.659.

**3e:** 1H NMR (300 MHz):  0.75 (d, 2H, *J*HH = 6.7 Hz), 0.87 (t, 3H, *J*HH = 6.4 Hz), 0.91 (d, 3H, *J*HH = 6.7 Hz),1.29 (t, 6H, 3*J*PH = 7.1 Hz), 1.20-1.93 (overlap , 5H), 2.32 (broad m, 1H), 2.51 (broad m , 2H), 4.03 (m, 4H), 5.97 (d, 1H, 2*J*PH = 17.0 Hz), 7.15-7.45 (m, 5H); 31P NMR (300 MHz):  19.32; 13C NMR (75.5 MHz):  169.5 (d, 2*J*pc = 6.6 Hz), 143.8, 128.6, 127.3, 126.7, 110.3 (d, 1*J*pc = 189.1 Hz), 82.4 (d, 3*J*pc = 20.0 Hz, *trans*), 61.1 (d, 2*J*pc = 5.6 Hz), 32.8, 32.3, 30.3 (d, 3*J*pc = 7.0 Hz, *cis*), 23.9, 17.1, 16.3 (d, 3*J*pc = 6.3 Hz), 13.9; MS(EI):m/z (%) 386 (0.5), 353 (1.4), 325 (3.3), 207(5.2), 187 (5.1), 145 (11.6), 115 (9.5). 105 (21.4), 77 (21.9), 43 (67.1), 29 (35.7), 18 (100). Anal. Calcd. for C20H33O4P: C, 65.197; H, 9.028; P, 8.406. Found: C, 64.899; H, 8.88; P, 8.33.

**4a:** 1H NMR (300 MHz):  0.95 (t, 3H, *J*HH = 7.2 Hz), 0.99 (s, 9H), 1.30 (t, 3H, 3*J*PH = 7.2 Hz), 1.34 (t, 3H, 3*J*PH = 7.2 Hz), 1.25-1.63 (overlap , 4H), 2.70 (broad m, 1H), 3.13 (broad m , 1H), 3.70 (s, 1H), 3.95-4.12 (overlap m, 5H), 7.20-7.50 (m, 5H); 31P NMR (300 MHz):  18.85; 13C NMR (75.5 MHz):  160.7 (d, 2*J*pc = 14.6 Hz), 148.9 (d, *J*pc = 12.6 Hz), 144.1 (d, 3*J*pc = 22.7 Hz), 130.1 (d, 1*J*pc = 190.3 Hz), 126.4, 125.9, 125.2, 120.5, 62.8 (d, 2*J*pc = 15.8 Hz, *trans*), 61.2 (d, 2*J*pc = 5.7 Hz), 35.7, 31.6 (d, 3*J*pc = 2.3 Hz), 28.9, 27.3, 21.3,16.2 (d, 3*J*pc = 6.3 Hz), 13.9;MS(EI):m/z (%) 364 (0.5), 349 (1.8), 308 (100), 265 (50), 237 (14.4), 209 (37.5), 128 (35.1), 57 (31.7), 43 (25.0), 29 (25.1). Anal. Calcd. for C21H35O4P: C, 65.946; H, 9.224; P, 8.098. Found: C, 65.887; H, 9.136; P, 8.013.

**4b:** 1H NMR (300 MHz):  0.49 (t, 3H, *J*HH = 7.5 Hz), 0.92 (t, 3H, *J*HH = 7.2 Hz), 1.33 (t, 6H, 3*J*PH = 6.9 Hz), 1.25-1.63 (overlap , 4H), 2.15 (broad t, 2H, *J*HH = 7.9 Hz), 2.90 ( broad m, 1H), 3.00 (broad m , 1H), 3.46 (s, 1H), 4.05-4.18 (overlap m, 5H), 6.98-7.50 (m, 5H); 31P NMR (300 MHz):  17.59; 13C NMR (75.5 MHz):  159.1 (d, 2*J*pc = 16.9 Hz), 149.1 (d, *J*pc = 12.9 Hz), 143.9 (d, 3*J*pc = 23.0 Hz, *trans*), 129.0 (d, 1*J*pc = 195.2 Hz), 128.0 (d, *J*pc = 8.5 Hz), 127.1, 126.5, 61.3 (d, 2*J*pc = 4.4 Hz), 52.7 (d, 2*J*pc = 15.5 Hz), 31.8 (d, 3*J*pc = 2.0 Hz), 27.0 (d, 4*J*pc = 2.0 Hz), 23.0, 16.4 (d, 3*J*pc = 6.2 Hz), 13.9, 8.0; MS(EI):m/z (%) 336 (9.1), 307 (7.7), 293 (1.9), 279 (3.4), 198 (100), 169 (31.2), 156 (99.0), 141 (50.0), 128 (45.2), 115 (32.7), 81 (11.5), 43 (14.4), 41 (21.6), 29 (84.6). Anal. Calcd. for C19H31O4P: C, 64.388; H, 8.816; P, 8.739. Found: C, 64.088; H, 8.755; P, 8.68.

**5a:** 1H NMR (300 MHz):  0.91 (t, 3H, *J*HH = 5.6 Hz), 0.98 (d, 3H, *J*HH = 6.6 Hz), 1.04 (d, 3H, *J*HH = 6.9 Hz), 1.19 (s, 9H), 1.30 (t, 3H, 3*J*PH = 7.2 Hz), 1.37 (t, 3H, 3*J*PH = 7.2 Hz), 1.20-1.80 (overlap, 4 H), 2.13 (t, 1H), 2.34 (m, 1H), 2.63 (m, 1H), 4.08 (m, 4H); 31P NMR (300 MHz):  12.68; 13C NMR (75.5 MHz):  213.5 (d, 2*J*pc = 12.6 Hz), 165.5 (d, 2*J*pc = 4.8 Hz), 128.4 (d, 1*J*pc = 171.6 Hz), 61.1 (d, 2*J*pc = 6.0 Hz), 44.6, 36.2 (d, 3*J*pc = 19.8 Hz, *trans*), 33.0 (d, 4*J*PC = 2.3 Hz), 29.0 (d, 3*J*PC = 8.3 Hz, *cis*), 28.0, 23.6, 22.2, 19.4, 16.2 (d, 3*J*pc = 6.6 Hz), 13.8; MS(EI):m/z (%) 346 (1.0), 289 (100), 261 (3.8), 233 (21.4), 115 (16.3), 57 (8.2), 43 (9.6), 28 (13.9). Anal. Calcd. for C18H35O4P: C, 62.404; H, 10.183; P, 8.940. Found: C, 62.332; H, 10.102; P, 8.877.

**5b:** 1H NMR (300 MHz):  0.75 (t, 3H, *J*HH = 6.6 Hz), 0.96 (t, 6H, 3*J*PH = 7.2 Hz), 0.65-1.80 (overlap, 4 H), 2.45 (m, 1H), 2.53 (broad m , 2H), 4.02 (m, 4H), 7.26-8.07 (m, 5H); 31P NMR (300 MHz):  12.15; 13C NMR (75.5 MHz):  195.8 (d, 2*J*pc = 12.4 Hz), 168.1 (d, 2*J*pc = 5.4 Hz), 133.4, 131.5 (d, 1*J*pc = 172.6 Hz), 128.4, 127.0, 61.0 (d, 2*J*pc = 6.1 Hz), 36.3 (d, 3*J*pc = 19.0 Hz, *trans*), 30.8 (d, 4*J*PC = 2.3 Hz), 29.8 (d, 3*J*PC = 8.0 Hz, *cis*), 23.7, 22.1, 16.4 (d, 3*J*pc = 6.3 Hz), 13.8; MS(EI):m/z (%) 366 (7.4), 351 (28.7), 323 (55.5), 295(12.0), 229 (17.6), 210 (19.9), 105 (100), 77 (54.6), 43 (14.9), 41 (14.8), 28 (12.0). Anal. Calcd. for C20H31O4P: C, 65.556; H, 8.527; P, 8.453. Found: C, 65.422; H, 8.398; P, 8.388.

**5c:** 1H NMR (300 MHz):  0.84 (t, 3H, *J*HH = 7.2 Hz), 0.86 (t, 3H, *J*HH = 7.5 Hz), 0.90 (d, 3H, *J*HH = 6.6 Hz), 1.04 (d, 3H, *J*HH = 6.6 Hz), 1.29 (t, 6H, 3*J*PH = 7.2 Hz), 1.16-2.10 (overlap, 4 H), 2.30 (t, 1H, *J*HH = 5.5 Hz), 2.38 (broad m, 2H), 2.39 (m, 1H), 2.56 (t, 1H, *J*HH = 5.5 Hz), 4.06 (m, 4H); 31P NMR (300 MHz):  13.00; 13C NMR (75.5 MHz):  206.1 (d, 2*J*pc = 12.2 Hz), 165.3 (d, 2*J*pc = 5.6 Hz), 128.2 (d, 1*J*pc = 174.6 Hz), 61.0 (d, 2*J*pc = 6.1 Hz), 36.3 (d, 3*J*pc = 20.1 Hz, *trans*), 33.0 (d, 4*J*PC = 2.3 Hz), 28.8 (d, 3*J*PC = 8.0 Hz, *cis*), 24.1, 22.3, 16.4 (d, 3*J*pc = 6.2 Hz), 14.9, 14.1; MS(EI):m/z (%) 318 (3.7), 317 (25.0), 303 (12.0), 289 (20.8), 278 (27.8), 207 (51.9), 139 (82.4), 98 (100), 69 (38.9), 57 (31.0), 43 (42.6), 41 (37.0), 29 (13.0). Anal. Calcd. for C16H31O4P: C, 60.358; H, 9.814; P, 9.728. Found: C, 59.947; H, 10.011; P, 9.600.
